# Supplementary material
Source: HighWire-hosted journal article supplement (https://www.genetics.org/content/suppl/2010/08/09/genetics.110.119917)
Supplement: FigureS7.pdf [file FigureS7.pdf]

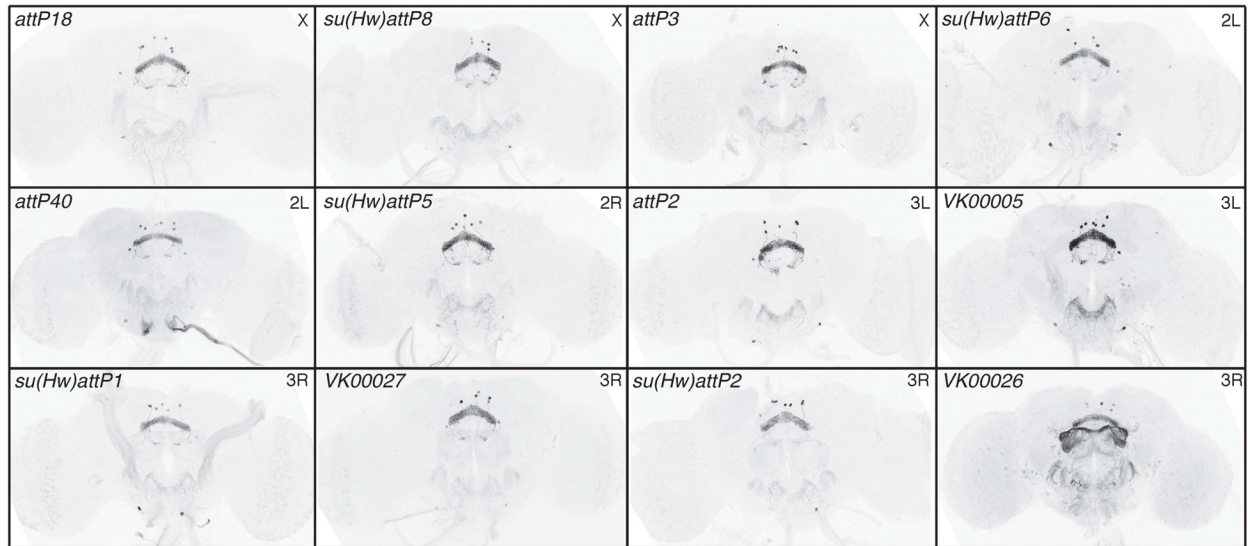

FIGURE S7.—Chromatin effects on pJFRC2, assayed by R9D11-GAL4. *Drosophila* adult brains immunostained for GFP. pJFRC2 was integrated in twelve docking sites and crossed to R9D11-GAL4 in *attP2*. The genomic docking site is shown in the upper left corner of each panel and the chromosome arm of the insertion site in the upper right. The same sites gave acceptable results as observed with R9C11 (see Figure 15).
